# Supplementary material for: Big Data Palaeoecology reveals significant variation in Black Death mortality in Europe
Source: Research Square preprint supplement (doi:10.21203/rs.3.rs-581474/v1), 2021-07-02
Supplement: Supplementary file 2 [file baa73bf7759620a3b56256fe.xlsx]

## Sheet: Foglio1
Acronym	Name	Taxon excluded from the pollen sum	Full reference to primary publication	Age-depth model
ÅBO	Åbodasjön	-	Fredh, D. et al. The effect of local land-use changes on floristic diversity during the past 1000 years in southern Sweden. The Holocene 27, 694-711 (2017).	Bragée, P., Choudhary, P., Routh, J., Boyle, J.F. & Hammarlund D. Lake ecosystem responses to catchment disturbance and airborne pollution: An 800-year perspective in southern Sweden. Journal of Paleolimnology 50, 545-560 (2013).
AHILL	Amicombe Hill	-	Fyfe, R.M., unpublished data.	Unpublished
AHL5	Ahlenmoor	-	Behre, K.-E. Pollenanalytische Untersuchungen zur Vegetations- und Siedlungsgeschichte bei Flögeln und im Ahlenmoor (Elb-Weser-Winkel). Probleme der Küstenforschung im südlichen Nordseegebiet 11, 101-118 (1976).	New model
AHLBECKE	Ahlbecker Seegrund	-	de Klerk, P. A pollen diagram from the Ahlbecker Seegrund (Ueckermünder Heide, Vorpommern, NE Germany) from the legacy of Franz Fukarek. Archiv für Naturschutz und Landschaftsforschung 44(3), 93-108 (2005).	EPD
AHLEQUEL	Ahlequellmoor	-	Jahns, S. The later Holocene history of vegetation, land-use and settlements around the Ahlequellmoor in the Solling Area, Germany. Vegetation History and Archaeobotany 15(1), 57-63 (2006).	New model
ALB	Albano	-	Mercuri, A. M., Accorsi, C. A., & Mazzanti, M. B. The long history of Cannabis and its cultivation by the Romans in central Italy, shown by pollen records from Lago Albano and Lago di Nemi. Vegetation History and Archaeobotany 11(4), 263-276 (2002).	Rolph, T. C., Vigliotti, L., & Oldfield, F. Mineral magnetism and geomagnetic secular variation of marine and lacustrine sediments from central Italy: timing and nature of local and regional Holocene environmental change. Quaternary Science Reviews 23(14-15), 1699-1722 (2004).
ALLSAINT	All Saints Bog	Cyperaceae, Ericaceae	Cole, E.E. & Mitchell, F.J.G. Human impact on the Irish landscape during the late Holocene inferred from palynological studies at three peatland sites. The Holocene 13(4), 507-515 (2003).	Cole, E.E. Multi-proxy Evidence from bogs for environmental change in Ireland over the last 1,200 years. Doctoral dissertation. University of Dublin, Trinity College, Dublin, Leinster, Ireland (2000).
Araisu	Araisu	Cyperaceae	Stivrins, N. et al. Landscape change in central Latvia since the Iron Age: multi-proxy analysis of the vegetation impact of conflict, colonization and economic expansion during the last 2,000 years. Vegetation History and Archaeobotany 24, 377-391 (2015).	Stivrins, N. et al. Detection of the Askja AD 1875 cryptotephra in Latvia, Eastern Europe. Journal of Quaternary Science 31, 437-441 (2016).
ARBARRA	Arbarrain mire	Cyperaceae	Pérez-Díaz, S., López-Sáez, J.A., Núñez de la Fuente, S. & Ruiz-Alonso, M. Early farmers, megalithic builders and the shaping of the cultural landscapes during the Holocene in Northern Iberian mountains. A palaeoenvironmental perspective. Journal of Archaeological Science: Reports 18, 463-474 (2018).	New model
AREO	Monte Areo mire	-	López-Merino, L., Martínez-Cortizas, A. & López-Sáez, J.A. Early agriculture and palaeoenvironmental history in the North of the Iberian Peninsula: a multi-proxy analysis of the Monte Areo mire (Asturias, Spain). Journal of Archaeological Science 37, 1978-1988 (2010).	Original publication
Arikula	Arikula	-	Brown, A.D. Vegetation change in Livonia: the palynological data. In: Pluskowksi, A.G. (ed.) Environment, Colonization, and the Crusader States in Medieval Livonia and Prussia. Brepols, Turnhout, 105-136 (2019).	Original publication
AYDAT	Lake Aydat	Cyperaceae	Miras, Y. et al. Tracking long-term human impacts on landscape, vegetal biodiversity and water quality in the Lake Aydat catchment (Auvergne, France) using pollen, non-pollen palynomorphs and diatom assemblages. Palaeogeography, Palaeoclimatology, Palaeoecology 424, 76-90 (2015).	Lavrieux, M. et al. 6700 yr sedimentary record of climatic and anthropogenic signals in Lake Aydat (French Massif Central). The Holocene 23(9), 1317-1328 (2013)
BABINSKO	Lake Babinskoye	-	Sandgren, P., Subetto, D.A., Berglund, B.E., Davydova, N.N. & Savelieva, L.A. Mid-Holocene Littorina Sea transgressions based on stratigraphic studies in coastal lakes of NW Russia. GFF 126(4), 363-380 (2004).	Original publication
BAFORIER	La Baforière	Calluna vulgaris	Barbier, D. Histoire de la végétation du nord-mayennais de la fin du Weichsélien à l'aube du XXIeme siècle. Mise en évidence d'un Tardiglaciaire armoricain. Interactions Homme-Milieu. Thèse de doctorat de l'Université de Nantes. Biologie. Spécialité : Palynologie (1999).	EPD
BAG	Baggabygget	-	Björkman, L. Pollenanalytisk undersökning av en torvmarkslagerföljd från Baggabygget i Rönnö naturreservat, Laholms kommun. Lundqua Uppdrag 55. Department of Quaternary Geology, Lund University (2005).	Original publication
BALLINDE	Ballinderry	Cyperaceae	O'Carroll E. Quantifying woodland resource usage in the Irish midlands using archaeological and palaeoecological techniques. Doctoral dissertation. University of Dublin, Trinity College, Dublin, Ireland (2012).	Original publication
BALLYDUF	Ballyduff	-	Stefanini, B.S. A comparison of climate and vegetation dynamics in central Ireland and NW Spain since the mid-Holocene. Doctoral dissertation. University of Dublin, Trinity College, Dublin, Leinster, Ireland (2008).	Original publication
BAM	Broad Amicombe Hole	Cyperaceae	Maguire, D.J. The inception and growth of blanket peat: a study of northern Dartmoor. Unpublished PhD thesis, University of Bristol (1983).	Original publication
BATOCAS	Batocas	-	Ferreira, C.S., Plunkett, G. & Fontes L. Cultural land use and vegetation dynamics in the uplands of northern Portugal from the Middle Ages to the Modern period. Journal of Quaternary Science 35(5), 1-11 (2020).	Original publication
Benowo	Benowo	-	Brown, A.D. Vegetation change in Prussia: the palynological data. In: Pluskowksi, A.G. (ed.) Environment, Colonization, and the Crusader States in Medieval Livonia and Prussia. Brepols, Turnhout, 293-332 (2019).	Original publication
BI	BukrzynoI	Cyperaceae	Pędziszewska, A., unpublished data.	Unpublished
BITSCH3	Bitsch-Naters	Cyperaceae	van der Knaap, W.O. & Ammann B. Depth-age relationships of 25 well-dated Swiss Holocene pollen sequences archived in the Alpine Palynological Data-Base. Revue de Paléobiologie 16(2), 433-480 (1997).	Original publication
BJÄ	Bjärabygget	-	Lagerås, P. The ecology of expansion and abandonment: medieval and post-medieval land-use and settlement dynamics in a landscape perspective. Riksantikvarieämbetet, Stockholm (2007).	Original publication
Blanku Mire	Blanku Mire	-	Brown, A.D. Vegetation change in Livonia: the palynological data. In: Pluskowksi, A.G. (ed.) Environment, Colonization, and the Crusader States in Medieval Livonia and Prussia. Brepols, Turnhout, 105-136 (2019).	Original publication
Blusu Mire	Blusu Mire	-	Brown, A.D. Vegetation change in Livonia: the palynological data. In: Pluskowksi, A.G. (ed.) Environment, Colonization, and the Crusader States in Medieval Livonia and Prussia. Brepols, Turnhout, 105-136 (2019).	Original publication
BOC	Bocksten	-	Björkman, L. The history of Fagus forest in southwestern Sweden during the last 1500 years. The Holocene 7, 419-432 (1997).	Original publication
BÖH	Böhringer See	Cyperaceae	Lechterbeck, J. & Rösch, M. Böhringer See, western Lake Constance (Germany): an 8500 year record of vegetation change. Grana, (2020). https://doi.org/10.1080/00173134.2020.1784265	Original publication
BOURGUS2	La Prairie du Cassoir	-	Visset, L., Pont, C., Carcaud, N., Bernard, J. & Violot J.M. Etude paléoenvironnementale de la vallée du Lane du Néolithique au Moyen-Age, Saint Nicolas de Bourgueil (Indre-et-Loire), la Prairie du Cassoir. Quaternaire 10(4), 247-261 (1999).	EPD
BRÅ	Bråtamossen	-	Lagerås, P., Jansson, K. & Vestbö, A. Land-use history of the Axlarp area in the Småland uplands, southern Sweden: palaeoecological and archaeological investigations. Vegetation History and Archaeobotany 4, 223-234 (1995).	Original publication
BRAMELOU	Brameloup	-	de Beaulieu, J.L., Pons, A. & Reille, M. Recherches pollenanalytiques sur l'histoire Tardiglaciaire et Holocène de la végétation des Monts d'Aubrac (Massif Central, France). Review of Palaeobotany and Palynology 44, 37-80 (1985).	EPD
BREJO	Brejo	-	Ferreira, C. Late Holocene vegetation and cultural land-use in the uplands of N Portugal. Unpublished Ph.D. Thesis, Queen's University Belfast, Belfast (2017).	Original publication
BRENILIS	Lac de Brennilis	-	Marguerie, D. & Visset L. Etude palynologique des tourbières de Yeun Elez, réservoir Saint-Michel, Monts d'Arrée (Finistère) : contribution à la connaissance du développement et de la sauvegarde des marais. Rapport pour le Conseil Général du Finistère, UMR 6566 (1995).	EPD
BROADOWN	Broad Down	-	Fyfe, R.M. & Woodbridge J. Differences in time and space in upland vegetation patterning: analysis of pollen data from Dartmoor, UK. Lanscape Ecology 27(5), 745-760 (2012).	Original publication
BRUCHBRG2	Burchberg 2	-	Willutzki, H. Zur Waldgeschichte und Vermoorung sowie über Rekurrenzflächen im Oberharz. Nova Acta Leopoldina 25(160), 1-52 (1962).	New model
Brv	Břve	-	Pokorný, P. & van der Knaap, W.O. 15. Brve (Czech Republic): vegetation development over the last about 2.5 millennia in the Bohemian lowland close to Prague. Grana 50(4), 311-313 (2011).	PALYCZ (Chron #2)
BUC	Buchensee	Cyperaceae	Rösch, M. & Wick, L. 43. Buchensee (Lake Constance region, Germany). Grana 58(4), 308-310 (2019).	Original publication
CARC14	Les Cars	-	Miras, Y., Guenet, P. & Richard, H. La genèse du paysage culturel du plateau de Millevaches (Limousin, Massif Central, France): plus de 2000 ans d'histoire révélés par l'analyse pollinique. In: Grandcoing P. (ed.) Paysage et environnement en Limousin, de l'Antiquité à nos jours. Presses Universitaires de Limoges, 99-124 (2010).	EPD
CARKEFOU	Carquefou	Alnus	Cyprien, A.L. & Visset L. Paleoenvironmental study of the Carquefou site (Massif Armoricain, France) from the end of the Sub-boreal. Vegetation History and Archaeobotany 10(3), 139-149 (2001).	EPD
CARKTRAN	Carquefou	Alnus	Cyprien, A.L. & Visset L. Paleoenvironmental study of the Carquefou site (Massif Armoricain, France) from the end of the Sub-boreal. Vegetation History and Archaeobotany 10(3), 139-149 (2001).	EPD
CASTEL	Castelló Lagoon	Cyperaceae	Ejarque, A. et al. Coastal Evolution in a Mediterranean Microtidal Zone: Mid to Late Holocene Natural Dynamics and Human Management of the Castelló Lagoon, NE Spain. PLoS ONE 11(5), e0155446 (2016).	Original publication
CAVAMONT	Caves d'Amont	-	Carcaud, N., Garcin, M., Visset, L., Musch, J. & Burnouf J. Nouvelle lecture de l'évolution des paysages fluviaux à l'Holocène dans le bassin de la Loire moyenne. In: Les fleuves ont une histoire: Paléo-environnement des rivières et des lacs français depuis 15 000 ans. Archéologie Aujourd'hui, Edition Errance, 71-84 (2002).	EPD
CERGOWA	Cergowa Góa	Cyperaceae	Szczepanek, K. Anthropogenic vegetation changes in the region of the Dukla Pass, the Lower BeskidMountains. In: Machnik, J. (ed.), Archaeology and Natural Background of the Lower Beskid Mountains. Polska Akademia Umiejętności, Kraków (2001).	New model
CERINTB3	Lac Cerin	-	Ruffaldi, P. Histoire de la végétation du Jura méridional depuis le retrait du glacier würmien à partir des analyses palynologiques du lac de Cerin (Ain, France). Thèse, Université de Franche-Comté (1993).	Original publication
CHALERIE	Challerie	Cyperaceae	Visset, L., Cyprien, A.L. & Carcaud N. Paléoenvironnements tardiglaciaires et holocènes de l'Orléanais (Loiret). Les sites de Saint-Benoît-sur-Loire et de la vallée des Mauves à Meung-sur-Loire. Revue Archéologique du Loiret 34, 11-26 (2010).	EPD
CHAMPTOC	Marais de Champtocé	-	Cyprien, A.L. Chronologie de l'interaction de l'homme et du milieu dans l'espace central et aval de la Loire (Ouest de la France). Thèse en biologie, spécialité palynologie, Université de Nantes (2001).	EPD
CHANGE	Change-Glatinier	Calluna vulgaris	Barbier, D. Histoire de la végétation du nord-mayennais de la fin du Weichsélien à l'aube du XXIeme siècle. Mise en évidence d'un Tardiglaciaire armoricain. Interactions Homme-Milieu. Thèse de doctorat de l'Université de Nantes. Biologie. Spécialité : Palynologie (1999).	New model
CHAVANTS	Tourbières des Granges des Chavants	-	de Beaulieu, J.L., Kostenzer, J. & Reich K. Dynamique forestière holocène dans la haute vallée de l'Arve (Haute-Savoie) et migrations de Abies et Picea dans les Alpes occidentales. Dissertationes Botanicae 196, 387-398 (1993).	Original publication
CHYCINA	Chyciny Lake	-	Noryśkiewicz, A.M. Palinologiczny obraz wczsnośredniowiecznego osadnictwa pogranicza wielkopolsko-lubuskiego (jeziora Paklicko Wielke, Długie i Lubiąż). In: Chudziak, W. &Kaźmierczak R. (eds.) Człowiek na pograniczu. Na peryferiach Civitas Schinesghe. Instytut Archeologii UMK w Toruniu, Toruń, 93-105 (2020).	Original publication
COUDERT	Les Chaux de Coudert	Alnus	Miras, Y. L'analyse pollinique du plateau de Millevaches (Massif central, France) et de sites périfériques limousins et auvergnats: Approche des paléoenvironnements, des systèmes agro-pastoraux et évolution des territoires ruraux. [The pollen analysis of the plateau de Millevaches (Massif central, France) and of surrounding sites in Limousin and Auvergne]. Thesis of Biology. Université de Franche…	EPD
COULVAIN	Coulvain	-	Clet-Pellerin, M., unpublished data.	EPD
CULAZON	Culazón	Cyperaceae	López-Sáez, J.A. et al. Contribution to the European Pollen Database. 20. Culazón, Cantabrian Mountains (northern Spain). Grana 52(4), 316-318 (2013).	Original publication
CZYSTE	Czyste Lake	-	Pędziszewska, A. et al. Pollen evidence of change in environment and settlement during the 1st millennium AD. In: Bursche, A., Hines, J. & Zapolska A. (eds.) The Migration Period between the Odra and the Vistula. Vol. 1. Koninklijke Brill NV, Leiden, The Netherlands, 137-198 (2020).	Original publication
DISTRE	Marais de Munet	-	Cyprien, A.L., Carcaud, N. & Visset L. Etude paléoenvironnementale du Marais de Distré (Saumurois) : géoarchéologie d'une zone himide depuis le Préboréal. Quaternaire 12(1-2), 89-101 (2001).	EPD
DOJR	Dojran	-	Masi, A. et al. Vegetation history and paleoclimate at Lake Dojran (FYROM/Greece) during the Late Glacial and Holocene. Clim past 14, 351-367 (2018).	New model
DOLINA	Zlatnicka Dolina	Cyperaceae	Rybníček, K. & Rybníčková, E. A palaeoecological reconstruction of precultural vegetation in the intermontane basins of the Western Carpathians. Ecologia Mediterranea 11(1), 27-31 (1985).	New model
DUNUM	Dunum (Hilliges Moor)	-	Behre, K.E. Zur mittelalterlichen Plaggenwirtschaft in Nordwestdeutschland und angrenzenden Gebieten nach botanischen Untersuchungen. Abhandlungen der Akademie der Wissenschaften Göttingen, Philologisch-historische Klasse 3, F, Nr.116, Göttingen, 30-44 (1980).	EPD
ELPAYO	El Payo	-	Silva-Sánchez, N., Martínez Cortizas, A., Abel-Schaad, D., López-Sáez, J.A. & Mighall, T.M. Influence of climate change and human activities on the organic and inorganic composition of peat during the ‘Little Ice Age’ (El Payo mire, W Spain). The Holocene 26(8), 1290-1303 (2016).	Original publication
ESPINASS	Narse d'Espinasse	Cyperaceae	Miras, Y., Laggoun-Défarge, F., Guenet, P. & Richard, H. Multi-disciplinary approach to changes in agro- pastoral activities since the Sub-Boreal in the surroundings of the "narse d'Espinasse" (Puy de Dôme, French Massif Central). Vegetation History and Archaeobotany 13, 91-103 (2004).	Original publication
EXH	Exhult	-	Björkman, L. Pollenanalytisk undersökning av en torvmarkslagerföljd från den arkeologiska undersökningslokalen ”område 12/13” nordväst om Exhult inför ombyggnaden av E4:an, delen länsgränsen till Strömsnäsbruk, Markaryds kommun. Lundqua Uppdrag 47. Department of Quaternary Geology, Lund University (2003).	Original publication
FANGEAS	Fangeas	Cyperaceae	De Beaulieu, J.L. et al. Changements environnementaux postglaciaires et action de l'homme dans le bassin du Buëch et en Champsaur (Hautes-Alpes, France). Premier bilan d'une étude pluridisciplinaire. In: Des Milieux et des Hommes: Fragments d'Histoires Croisées, Collection Environnement, Elsevier, Paris, 93-101 (2003).	Original publication
FETOS	Chã dos Fetos	-	Ferreira, C. Late Holocene vegetation and cultural land-use in the uplands of N Portugal. Unpublished Ph.D. Thesis, Queen's University Belfast, Belfast (2017).	Original publication
FEUENRIE	Feuenried	-	Rösch, M. Holocene sediment accumulation in the shallow water zone of Lower Lake Constance. Arch. Hydrobiol./Suppl. 107 (Monographic Studies) 4, 541-562 (1997).	EPD
FLA	Flahult	-	Björkman, L. The role of human disturbance in the local late Holocene establishment of Fagus and Picea forests at Flahult, western Småland, southern Sweden. Vegetation History and Archaeobotany 6, 79-90 (1997).	Original publication
FLAFATTJ	Lake Flåfattj¢nna	-	Paus, A.A., Velle, G., Larsen, J., Nesje, A. & Lie ¥. Lateglacial nunataks in central Scandinavia: Biostratigraphical evidence for ice thickness from Lake Flåfattj¢nn, Tynset, Norway. Quaternary Science Reviews 25(11-12), 1228-1246 (2006).	EPD
FLOGELN5	Flögeln 5	-	Behre, K.-E. Pollenanalytische Untersuchungen zur Vegetations- und Siedlungsgeschichte bei Flögeln und im Ahlenmoor (Elb-Weser-Winkel). Probleme der Küstenforschung im südlichen Nordseegebiet 11, 101-118 (1976).	New model
FLOGHOLZ	Flögelner Holz	Alnus	Behre, K.E. & Kucan D. Die Reflektion archäologisch bekannter Siedlungen in Pollendiagrammen verschiedener Entfernung - Beispiele aus der Siedlungskammer Flögeln, Nordwestdeutschland. In: Behre, K.-E. (ed.), Anthropogenic Indicators in Pollen Diagrams, Balkema, Rotterdam, Boston, 95-114 (1986).	EPD
FOFMOBS6	Mobeche Forest	-	Clet-Pellerin, M., Helluin, M., Pellerin, J., Pilet-Lemiere, J. & Fontugne M. L'evolution des environnements végétaux pendant les deux derNrs millénaires dans la region de Fougers (Ille-et-Vilaine, France). Palynosciences 2, 39-55 (1993).	New model
FONTHENR	Fontaine Henry	-	Lespez, L. et al. Fluvial system evolution and environmental changes during the Holocene in the Mue valley (Western France). Geomorphology 98, 55-70 (2008).	EPD
FUHRENKA	Fuhrenkamp	-	Behre, K.E. & Kucan D. Die Geschichte der Kulturlandschaft und des Ackerbaus in der Siedlungskammer Flögeln, Niedersachsen, seit der Jungsteinzeit. Probleme der Küstenforschung im südlichen Nordseegebiet 21, Isensee, Oldenburg (1994).	EPD
G89	Giecz	Cyperaceae	Milecka, K. Historia działalności człowieka w okolicach Giecza i Wagowa w świetle analizy pyłkowej. In: Tobolski, K. (ed.) Biblioteka Studiów Lednickich. Vol. 3. Muzeum Pierwszych Piastów na Lednicy, Poznań (1998).	New model
GAIMBOS	Gaímbos	-	Ferreira, C. Late Holocene vegetation and cultural land-use in the uplands of N Portugal. Unpublished Ph.D. Thesis, Queen's University Belfast, Belfast (2017).	Original publication
GAZWA	Gązwa	-	Gałka, M. et al. Palaeoenvironmental changes in Central Europe (NE Poland) during the last 6200 years reconstructed from a high-resolution multi-proxy peat archive. The Holocene 25, 421-434 (2015).	Original publication
GDU	Durchenbergried	Cyperaceae	Rösch, M. Vegetationsgeschichtliche Untersuchungen im Durchenbergried. In: Siedlungsarchäologie im Alpenvorland 2, Forsch. u. Ber. z. Vor‑ u. Frühgeschichte Bad.‑Württ. 37, Stuttgart, 9‑56 (1990).	Original publication
GESVRES	Le Gesvres	-	Ouguerram, A. & L. Visset. Histoire de la végétation et première mise en évidence d'un milieu marin pendant l'Holocène dans la vallée de l'Erdre et le Val de Gesvres (Bassin versant de la Loire, Massif armoricain, France) [Palynological study of the Gesvres valley: history of the vegetation and the first evidence of the existence of a marine environment during the Holocene in the Erdre river syst…	EPD
GI	Gołębiewo I	Cyperaceae	Pędziszewska, A. & Latałowa, M. Stand-scale reconstruction of late Holocene forest succession on the Gdańsk Upland (N. Poland) based on integrated palynological and macrofossil data from paired sites. Veget Hist Archaeobot 25, 239-254 (2016).	Original publication
GLENDALO	Glendalough Valley	-	Mighall, T., Timpany, S., Critchley, M. F., Martinez Cortizas, A. & Silva Sanchez, N. A palaeoecological assessment of the impact of former metal mining atGlendalough, County Wicklow. Journal of the Mining Heritage Trust of Ireland 13, 9-22 (2013).	Original publication
GOSCI187	Gościąż	-	Arnold, M. et al. Lake Gosciaz, central Poland: A Monographic Study. Part 1. Szafer Institute of Botany Polish Academy of Sciences Lubicz 46, Kraków, Poland, 31-512 (1998).	Original publication
GRI	Grisavad	-	Lagerås, P. The ecology of expansion and abandonment: medieval and post-medieval land-use and settlement dynamics in a landscape perspective. Riksantikvarieämbetet, Stockholm (2007).	Original publication
GRU	Großer Ursee	Cyperaceae	Rösch, M., Stojakowits, P. & Friedmann, A. Does site elevation determine the onset and intensity of human impact? Pollen evidence from southern Germany. Vegetation History and Archaeobotany 30(2), 255-268 (2020).	Original publication
GWA1	Glaswaldsee	Alnus	Rösch, M. Botanical evidence for prehistoric and medieval land use in Black Forest. Medieval Rural Settlement in Marginal Landscapes. Ruralia VII, 8th-14th September 2007 Cardiff Wales, U.K., 335-343 (2007).	EPD
HAR	Hartsee	Cyperaceae	Rösch, M. & Lechterbeck, J. Zur spät- und nacheiszeitlichen Vegetations- und Landnutzungsgeschichte des Hegau. Fundberichte aus Baden-Württemberg (submitted).	Original publication
HARES	Hares Down	-	Fyfe, R.M., Brown, A.G. & Rippon S.J. Characterising the late prehistoric, "Romano-British" and medieval landscape, and dating the emergence of a regionally distinct agricultural system in South West Britain. Journal of Archaeological Science 31(12), 1699-1714 (2004).	Original publication
HES1	Herrenwiesser see	-	Rösch, M. Vegetation und Waldnutzung im Nordschwarzwald während sechs Jahrtausenden anhand von Profundalkernen aus dem Herrenwieser See. Standort.wald 47, 43-64 (2012).	EPD
HOB	Hornstaad/Bodensee	Alnus	Rösch, M. Human impact as registered in the pollen record: some results from the western Lake Constance region, Southern Germany. Veget Hist Archaeobot 1, 101-109 (1992).	EPD
HOPSTOP	Hopschensee	-	van der Knaap, W.O., van Leeuwen, J.F.N., Fankhauser, A. & Ammann B. Palynostratigraphy of the last centuries in Switzerland based on 23 lake and mire deposits: chronostratigraphic pollen markers, regional patterns, and local histories. Review of Palaeoecology and Palynology 108, 85-142 (2000).	Original publication
HUZ2	Huzenbacher See	-	Rösch, M. & Tserendorj G. Der Nordschwarzwald - früher besiedelt als gedacht? Pollenprofile belegen ausgedehnte vorgeschichtliche Besiedlung und Landnutzung. Denkmalpflege in Baden-Württemberg 40(2), 66-73 (2011).	EPD
Hys	Hýskov	-	Žák, K. et al. Holocenní profil ve stavební jámě malé vodní elektrárny Hýskov a jeho přínos k poznání vývoje nivy Berounky. Český Kras - Geologie, paleontologie 36, 42-51 (2010).	PALYCZ (Chron #2)
IM	Impiltis	-	Stančikaitė, M. et al. Human activity and the environment during the Late Iron Age and Middle Ages at the Impiltis archaeological site, NW Lithuania. Quaternary International 207(1–2), 74-90 (2009).	Original publication
IMMENMOO	Immenmoor	-	Behre, K.E. & Kucan D. Die Geschichte der Kulturlandschaft und des Ackerbaus in der Siedlungskammer Flögeln, Niedersachsen, seit der Jungsteinzeit. Probleme der Küstenforschung im südlichen Nordseegebiet 21, Isensee, Oldenburg (1994).	EPD
JACZNO	Jaczno	Cyperaceae, Ericaceae	Marcisz, K., Kołaczek, P., Gałka, M., Diaconou, A.-C. & Lamentowicz, M. Exceptional hydrological stability of a Sphagnum-dominated bog over the Late Holocene. Quaternary Science Reviews 231, 106180 (2020).	Original publication
JAGEN20	Jagen 20	-	Behre, K.E. & Kucan D. Die Geschichte der Kulturlandschaft und des Ackerbaus in der Siedlungskammer Flögeln, Niedersachsen, seit der Jungsteinzeit. Probleme der Küstenforschung im südlichen Nordseegebiet 21, Isensee, Oldenburg (1994).	EPD
JASIEL81	Jasiel	Cyperaceae	Szczepanek, K. Late-Glacial and Holocene pollen diagrams from Jasiel in the Low Beskid Mts. (The Carpathians). Acta Palaeobotanica 27(1), 9-26 (1987).	New model
JEZTR	Jezioro Trzechowskie	-	Ott, F. Late Glacial and Holocene climate and environmental evolution in the southern Baltic lowlands derived from varved lake sediments. Ph.D. thesis (2018).	Original publication
JOLAN2	Le Jolan	-	de Beaulieu, J.L., Pons, A., Reille, M. Recherches pollenanalytiques sur l'histoire de la végétation de la bordure nord du Massif du Cantal (Massif-Central, France). Pollen et Spores XXIV(2), 251-300 (1982).	EPD
K12	Kahala_s	-	Poska, A. & Saarse, L. Holocene vegetation and land-use history in the environments of Lake Kahala, northern Estonia. Vegetation History and Archaeobotany 8, 185-197 (1999).	Original publication
K19	Lasva	-	Niinemets, E. & Saarse, L. Fine-resolution pollen-based evidences of farming and forest development, south-eastern Estonia. Polish Journal of Ecology 55, 283-296 (2007).	Original publication
K24	Mustjärve	-	Veski, S. Vegetation history, human impact and palaeogeography of West Estonia. Pollen analytical studies of lake and bog sediments. Striae 38, Uppsala (1998).	EPD
K34	Rõuge	-	Veski, S., Koppel, K. & Poska, A. Integrated palaeoecological and historical data in the service of fine-resolution land use and ecological change assessment during the last 1000 years in Rõuge, southern Estonia. Journal of Biogeography 32, 1473-1488 (2005).	Original publication
K47	Vedruka	-	Poska, A. & Saarse, L. Vegetation development and introduction of agriculture to Saaremaa Island, Estonia: the human response to shore displacement. The Holocene 12, 555-568 (2002).	Original publication
K49	Verijärv	-	Niinemets, E. & Saarse, L. Holocene forest dynamics and human impact in southeastern Estonia. Vegetation History and Archaeobotany 16, 1-13 (2006).	EPD
KAARTLAM	Kaartlamminsuo	-	Rankama, T. & Vuorela I. Between inland and coast in Metal Age Finland - human impact on the premeval forests of Southern Ha"me during the Iron Age. Memoranda Societatis Pro Fauna et Flora Fennica 64, 25-34 (1988).	New model
KAZANIE	Kazanie	Cyperaceae	Czerwiński, S. et al. Environmental implications of past socioeconomic events in Greater Poland during the last 1200 years. Synthesis of paleoecological and historical data. Quaternary Science Reviews (accepted).	Original publication
KB1	Kusowo1	Cyperaceae	Gałka, M. et al. Disentangling the drivers for the development of a Baltic bog during the Little Ice Age in northern Poland. Quaternary International 328-329, 323-337 (2014).	Marcisz, K., Lamentowicz, M., Gałka, M., Colombaroli, D., Adolf, C., Tinner, W., 2019. Responses of vegetation and testate amoeba trait composition to fire disturbances in and around a bog in central European lowlands (northern Poland). Quaternary Science Reviews 208, 129-139.
KB2	Kusowo2	Cyperaceae	Marcisz, K. et al. Fire activity and hydrological dynamics in the past 5700 years reconstructed from Sphagnum peatlands along the oceanic–continental climatic gradient in northern Poland. Quaternary Science Reviews 177, 145-157 (2017).	Original publication
KELLYSLO	Kelly's Lough	-	Leira, M., Cole, E.E. & Mitchell, F.J.G. Peat erosion and atmospheric deposition impacts on an oligotrophic lake in eastern Ireland. Journal of Paleolimnology 38(1), 49-71 (2007).	Original publication
Khimaditis Ib	Khimaditis Ib	-	Bottema, S. Late quaternary vegetation history of North-Western Greece. PhD dissertation, University of Groningen (1974).	New model
KIRKKOSA	Kirkkosaari	-	Rankama, T. & Vuorela I. Between inland and coast in Metal Age Finland - human impact on the premeval forests of Southern Ha"me during the Iron Age. Memoranda Societatis Pro Fauna et Flora Fennica 64, 25-34 (1988).	New model
KOLMILAT	Lake Kolmilaträsk	-	Sarmaja-Korjonen, K., Vasari, Y. & Haeggström C.A. Taxus baccata and influence of Iron Age man on the vegetation in Åland, SW Finland. Annales Botanici Fennici 28, 143-159 (1991).	New model
KÖP	Köphult	-	Björkman, L. Pollenanalytisk undersökning av en torvmarkslagerföljd från den arkeologiska undersökningslokalen ”område 2” nordost om Köphult inför ombyggnaden av E4:an, delen länsgränsen till Strömsnäsbruk, Markaryds kommun. Lundqua Uppdrag 48. Department of Quaternary Geology, Lund University (2003).	Original publication
Kos	Košátky	-	Kozáková, R., unpublished data.	PALYCZ (Chron #2)
LABRADIL	Labradillos	Cyperaceae	Robles López, S., Manzano-Rodríguez, S., Pérez-Díaz, S. & López-Sáez, J.A. 35. Labradillos mire, Gregos Range (central Spain). Grana 56(5), 398-400 (2017).	Original publication
Lailias	Lailias	-	Gerasimidis, A. & Athanasiadis, N. Woodland history of northern Greece from the mid Holocene to recent time based on evidence from peat pollen profiles. Vegetation History and Archaeobotany 4, 109-116 (1995).	Original publication
Lake Rozlewisko	Lake Rozlewisko	-	Brown, A.D. Vegetation change in Prussia: the palynological data. In: Pluskowksi, A.G. (ed.) Environment, Colonization, and the Crusader States in Medieval Livonia and Prussia. Brepols, Turnhout, 293-332 (2019).	Original publication
LAKERACZ	Lake Racze	-	Latalowa, M. Man and vegetation in the pollen diagrams from Wolin Island. Acta Palaeobotanica 32, 123-249 (1992).	New model
LALECHE	Fuente de la Leche	Cyperaceae	Robles-Lopez, S. et al. The dialectic between deciduous and coniferous forests in central Iberia: Apalaeoenvironmental perspective during the late Holocene in the Gredos range. Quaternary International 470(A), 148-165 (2018).	Original publication
LAMEFIA	Lameira de Fiães	-	Ferreira, C.S., Plunkett, G. & Fontes L. Cultural land use and vegetation dynamics in the uplands of northern Portugal from the Middle Ages to the Modern period. Journal of Quaternary Science 35(5), 1-11 (2020).	Original publication
LANGEAI1	Cinq-Mars-la-Pile	-	Carcaud, N., Garcin, M., Visset, L., Musch, J. & Burnouf J. Nouvelle lecture de l'évolution des paysages fluviaux à l'Holocène dans le bassin de la Loire moyenne. In: Les fleuves ont une histoire: Paléo-environnement des rivières et des lacs français depuis 15 000 ans. Archéologie Aujourd'hui, Edition Errance, 71-84 (2002).	EPD
LANVIHAN	Lann Vihan	-	Visset, L., Delalande, C. & Joly C. Tourbière et marécage à Hoedic. Histoire du paysage depuis 6000 ans. Melvan, La Revue des Deux Iles 3, 25-35 (2006).	EPD
LANZBOG	Lanzahíta	Cyperaceae	López-Sáez, J.A. et al. Late Holocene ecological history of Pinus pinaster forests in the Sierra de Gredos of central Spain. Plant Ecology 206(2), 195-209 (2010).	Original publication
LARK	Larkbarrow	-	Davies, H., Fyfe, R.M. & Charman, D. Does peatland drainage damage the palaeoecological record? Review of Palaeobotany and Palynology 221, 92-105 (2015).	Original publication
LAVPICCO	Lago Piccolo di Avigliana	-	Finsinger, W. & Tinner W. Holocene vegetation and land-use changes in response to climatic changes in the forelands of the southwestern Alps, Italy. Journal of Quaternary Science 21(3), 243-258 (2006).	Finsinger, W. Et al. Temporal patterns in lacustrine stable isotopes as evidence for climate change during the late glacial in the Southern European Alps. Journal of Paleolimnology 40, 885-895 (2008).
LERNA	Lake Lerna	Cyperaceae	Vignola, C. et al. (in preparation).	New model
LEVARE	Lavaré	-	Barbier, D. Histoire de la végétation du nord-mayennais de la fin du Weichsélien à l'aube du XXIeme siècle. Mise en évidence d'un Tardiglaciaire armoricain. Interactions Homme-Milieu. Thèse de doctorat de l'Université de Nantes. Biologie. Spécialité : Palynologie (1999).	EPD
LHOLC	Long Holcombe	-	Fyfe, R.M., unpublished data.	Unpublished
Lielais Svetinu	Lielais Svetinu	-	Stivrins, N., Kalnina, L., Veski, S. & Zeimule, S. Local and regional Holocene vegetation dynamics at two sites in eastern Latvia. Boreal Environment Research 19, 310-322 (2014).	Original publication
LIN	Lindhultsgöl	-	Fredh, D. et al. The effect of local land-use changes on floristic diversity during the past 1000 years in southern Sweden. The Holocene 27, 694-711 (2017).	Bragée, P., Choudhary, P., Routh, J., Boyle, J.F. & Hammarlund D. Lake ecosystem responses to catchment disturbance and airborne pollution: An 800-year perspective in southern Sweden. Journal of Paleolimnology 50, 545-560 (2013).
LINJE	Linje	Cyperaceae, Calluna vulgaris	Marcisz, K. et al. Long-term hydrological dynamics and fire history over the last 2000 years in CE Europe reconstructed from a high-resolution peat archive. Quaternary Science Reviews 112, 138-152 (2015).	Original publication
LISLE	Marais de Lisle	-	Ouguerram, A. Histoire de la vallée de l'Erdre (affluent de la Loire, Massif armoricain, France) de la fin du tardiglaciaire aux époques actuelles. Thèse de biologie, spécialité palynologie, Université Moulay Ismaïl (Maroc) et Université de Nantes, France (2002).	EPD
LIT1	Litzelsee	-	Rösch, M. & Lechterbeck J. Seven Millennia of human impact as reflected in a high resolution pollen profile from the profundal sediments of Litzelsee, Lake Constance region, Germany. Vegetation History and Archaeobotany 25(2), 339-358 (2016)	EPD
Litochoro	Litochoro	-	Athanasiadis, N. Zur postglazialen Vegetationsentwicklung von Litochoro Katerinis und Pertouli Trikalon (Griechenland). Flora 164, 99-132 (1975).	EPD
LLIGAT	Portlligat	Cyperaceae	López-Sáez, J.A. et al. Palaeoecological potential of the marine organic deposits of Posidonia oceanica: A case study in the NE Iberian Peninsula. Palaeogeography, Palaeoclimatology, Palaeoecology 271, 215-224 (2009).	Original publication
LOBBS	Lobbs Bog	-	Fyfe, R.M., Brown, A.G. & Rippon S.J. Characterising the late prehistoric, "Romano-British" and medieval landscape, and dating the emergence of a regionally distinct agricultural system in South West Britain. Journal of Archaeological Science 31(12), 1699-1714 (2004).	Original publication
LOGNE	Logne	Alnus	Barbier, D. & Visset, L. Logné, a peat bog of European ecological interest in the Massif Armorican, Western France: Bog development, vegetation and land-use history. Vegetation History and Archaeobotany 6(2), 69-77 (1997).	EPD
LONGEYR2	Tourbière de Longeyroux	Cyperaceae	Miras, Y., Guenet, P. & Richard, H. Holocene vegetation, landscape and reconstruction of human activity from Prehistory to the Roman period based on new pollen data performed in "the Plateau de Millevaches" (Limousin, Massif Central, France). Quaternaire 22(2), 147-164 (2011).	Original publication
LOUGHMOY	Lough Moynagh	-	Stewart, R.J. The vegetation and land use history of Moynagh Lough, County Meath with correlation to the archaeoecological evidence from the site. Master's thesis. Trinity College Dublin, Dublin, Leinster, Ireland (1996).	Original publication
LUISSEL	Etang de Luissel Bex	-	Welten, M. Vegetationsgeschichtliche Untersuchungen in den westlichen Schweizer Alpen: Bern-Wallis. Denkschriften der Schweizerischen Naturforschenden Gesellschaft, Vol. 95 (1982).	Original publication
LUN	Lago Lungo	-	Mensing, S.A. et al. 2700 years of Mediterranean environmental change in central Italy: a synthesis of sedimentary and cultural records to interpret past impacts of climate on society. Quaternary Science Reviews 116, 72-94 (2015).	Original publication
MAI	El Maíllo	Cyperaceae	Morales-Molino, C., García-Antón, M., Postigo-Mijarra, J.M. & Morla, C. Holocene vegetation, fire and climate interactions on the westernmost fringe of the Mediterranean Basin. Quaternary Science Reviews 59, 5-17 (2013).	Original publication
MALINGUE	Malingue	-	Barbier, D. Histoire de la végétation du nord-mayennais de la fin du Weichsélien à l'aube du XXIeme siècle. Mise en évidence d'un Tardiglaciaire armoricain. Interactions Homme-Milieu. Thèse de doctorat de l'Université de Nantes. Biologie. Spécialité : Palynologie (1999).	EPD
MARS	Mars	Cyperaceae	Miras, Y. et al. Gestion des ressources naturelles dans le Pays de Tulle : impacts paysagers et histoire du châtaignier (Castanea satica Mill.) de l'Antiquité à la Renaissance d'après la palynologie. Aquitania 29, 311-330 (2013).	Original publication
MASTCLAI	Marais de Marchesieux	-	Verron, G. Le marais de Marchésieux. Découvertes de l' âge du Bronze et étude palynologique des tourbes. Gallia Préhistoire 20(2), 370-374 (1977).	EPD
MAT	Mattarp	-	Björkman, L. Long-term population dynamics of Fagus sylvatica at the northern limits of its distribution in southern Sweden: a palaeoecological study. The Holocene 6, 225-234 (1996).	Original publication
MAZEROL	Marais de Mazerolles	-	Ouguerram, A. Histoire de la vallée de l'Erdre (affluent de la Loire, Massif armoricain, France) de la fin du tardiglaciaire aux époques actuelles. Thèse de biologie, spécialité palynologie, Université Moulay Ismaïl (Maroc) et Université de Nantes, France (2002).	EPD
MBA	Aalkistensee	Cyperaceae	Rösch, M., Fischer, E. & Kury, B. Die Maulbronner Klosterweiher - Spiegel von vier Jahrtausenden Kulturlandschaftsgeschichte. Denkmalpflege in Baden-Württemberg 46(4), 282-287 (2017).	Original publication
MECHACZ	Mechacz	Cyperaceae	Gałka, M. et al. Unveiling exceptional Baltic bog ecohydrology, autogenic succession and climate change during the last 2000 years in CE Europe using replicate cores, multi-proxy data and functional traits of testate amoebae. Quaternary Science Reviews 156, 90-106 (2017).	Original publication
MELNO	Melno lake	-	Noryśkiewcz, A.M. Historia roślinności i osadnictwa ziemi chełmińskiej w późnym holocenie. Studium palinologiczne. UMK w Toruniu, Toruń (2013).	Original publication
MERON	Marais de Méron	-	Cyprien, A.L. Chronologie de l'interaction de l'homme et du milieu dans l'espace central et aval de la Loire (Ouest de la France). Thèse en biologie, spécialité palynologie, Université de Nantes, France (2001).	EPD
MEZZ	Lago di Mezzano	-	Sadori, L. The Lateglacial and Holocene vegetation and climate history of Lago di Mezzano (central Italy). Quaternary Science Reviews 202, 30-44 (2018).	Original publication
MIDNORCO	Middle North Coombe	-	Fyfe, R.M., Brown, A.G. & Rippon S.J. Characterising the late prehistoric, "Romano-British" and medieval landscape, and dating the emergence of a regionally distinct agricultural system in South West Britain. Journal of Archaeological Science 31(12), 1699-1714 (2004).	Original publication
MIN	Mindelsee	Cyperaceae	Rösch, M., Kleinmann, A., Lechterbeck, J., Wick L. Botanical off-site and on-site data as indicators of different land use systems: a discussion with examples from Southwest Germany. In: Bittmann F, Gerlach R, Rösch M, Schier W (eds.), Farming in the forest - Ecology and economy of fire in prehistoric agriculture. Veget Hist Archaeobot 23(1), 121-133 (2014).	Original publication
ML	Lake Miłkowskie	-	Wacnik, A., Goslar, T. & Czernik, J. Vegetation changes caused by agricultural societies in the Great Mazurian Lake District. Acta Palaeobotanica 52(1), 59-104 (2012).	Original publication
Mochulya	Mochulya peatland	-	Novenko, E.Y. et al. Palaeoecological evidence for climatic and human impacts on vegetation in the temperate deciduous forest zone of European Russia during the last 4200 years: A case study from the Kaluzhskiye Zaseki Nature Reserve. Quaternary International 516, 58-69(2019).	Original publication
MOLECHAM	Moles Chamber	-	Fyfe, R.M. Bronze Age landscape dynamics: spatially detailed pollen analysis from a ceremonial complex. Journal of Archaeological Science 39(8), 2764-2773 (2012).	Original publication
MOLINAES	La Molina mire	-	López-Merino, L. et al. Reconstructing the impact of human activities in a NW Iberian Roman mining landscape for the last 2500 years. Journal of Archaeological Science 50, 208-218 (2014).	Original publication
MONTSEC2	Tourbière de Mont Sec	Cyperaceae	Nakagawa, T. Etudes palynologiques dans les Alpes Françaises centrales et méridionales: histoire de la végétation Tardiglaciaire et Holocène [Pollen studies in the central meridional French Alps: Lateglacial and Holocene vegetation history] PhD Dissertation of Biology and Ecology, University of Marseille III (1998).	Original publication
MOSSEN	Mossen	-	Vuorela, I. Pollenanalytiska studier. In: Zilliacus, K. (ed.) Finska skären: Studier i aboländsk kulturhistoria. Konstsamfundet, Helsingfors, Finland, 115-133 (1990).	New model
MUZSKY	Mužský - hrada	-	Pokorný, P., unpublished data.	PALYCZ (Chron #1)
N-PEQ	Salada Pequeña	-	Davis, B.A.S. Paleolimnology and Holocene Environmental Change from Endoreic Lakes in the Ebro Basin, North-east Spain. Ph.D. Dissertation, University of Newcastle Upon Tyne, UK (1994).	Original publication
N-SAL	Laguna Salada Chiprana	-	Davis, B.A.S. Paleolimnology and Holocene Environmental Change from Endoreic Lakes in the Ebro Basin, North-east Spain. Ph.D. Dissertation, University of Newcastle Upon Tyne, UK (1994).	Original publication
NaB	Na bahně	-	Pokorný, P. et al. Late Holocene history and vegetation dynamics of a floodplain alder carr: a case study from Eastern Bohemia, Czech Republic. Folia Geobotanica 35(1), 43-58 (2000).	PALYCZ (Chron #1)
NAUDIERE	Les Naudières	-	Poirier, N., Morin, E., Joly, C., Leturcq, S. & Visset L. Occupation du sol et impact érosif dans la vallée de la Choisille (France, Indre-et-Loire) : approches croisées pour la restitution des paysages anciens. ArchéoSciences, revue d'archéometrie 37, 67-88 (2013).	EPD
NAVALACA	Arroyo de Navalacarreta	Cyperaceae	Morales-Molino, C. et al. Land-use history as a major driver for long-term forest dynamics in the Sierra de Guadarrama National Park (central Spain) during the last millennia: implications for forest conservation and management. Global and Planetary Change 152, 64-75 (2017).	Original publication
NAY	Tourbière de Nay	-	Ouguerram, A. & Visset L. Palynologie de la tourbière de Nay dans la vallée de l'Erdre, affluent de la Loire (Massif armoricain, France). Histoire de la végétation et du peuplement humain. Journal de la Société botanique de France 13, 35-45 (2001).	EPD
NIKOLSK	Nikokolsko-Lutinskoye bog	-	Arslanov, K.A. et al. Chronology of vegetation and paleoclimatic stages of North-Western during the Late Glacial and Holocene. Radiocarbon 41(1), 25-45 (1999).	Original publication
Nineris Mire	Nineris Mire	-	Brown, A.D. Vegetation change in Livonia: the palynological data. In: Pluskowksi, A.G. (ed.) Environment, Colonization, and the Crusader States in Medieval Livonia and Prussia. Brepols, Turnhout, 105-136 (2019).	Original publication
NIZHNEOS	Nizhneosinovskoye peat bog	-	Dolukhanov, P.M. et al. Evolution of waterways and early human settlements in the eastern Baltic area: radiocarbon-based chronology. Radiocarbon 49(2), 527-542 (2007).	Original publication
NORTHTWI	North Twitchen Springs	-	Fyfe, R.M. Bronze Age landscape dynamics: spatially detailed pollen analysis from a ceremonial complex. Journal of Archaeological Science 39(8), 2764-2773 (2012).	Original publication
ÖGG	Öggestorpsdalen	-	Björkman, L. Pollenanalytisk undersökning av tre torvmarkslokaler från Öggestorps och Rogberga socknar inför ombyggnaden av Riksväg 31, delen Öggestorp–Åkarp, Jönköpings kommun. Lundqua Uppdrag 45. Department of Quaternary Geology, Lund University (2003).	Original publication
OJOALBO	Ojos Albos	Cyperaceae	Blanco-Gonzalez, A., Lopez-Saez, J.A. & Lopez-Merino, L. Ocupación y uso del territorio en el sector centromeridional de la Cuenca del Duero entre la Antigüedad y la Alta Edad Media (siglos I-XI d.C.). Archivo Español de Arqueología 82, 275-300 (2009).	New model
OSRI	Östra Ringarp	-	Lagerås, P. The ecology of expansion and abandonment: medieval and post-medieval land-use and settlement dynamics in a landscape perspective. Riksantikvarieämbetet, Stockholm (2007).	Original publication
OTTAFS	Afstj¢rna	-	Birks, H.H., Birks, H.J.B., Bjune, A.E. & Felde V.A. (organizers), internal report. XXXVI International Bog ('Moor') Excursion of the Institute of Plant Sciences, University of Bern, southern and south-eastern Norway, 8-13 September 2012, Excursion Guide. University of Bergen, Norway and Bjerknes Centre for Climate Research, Bergen, Norway (2012).	EPD
OTTKIN	Kinnshaugen	-	Birks, H.H., Birks, H.J.B., Bjune, A.E. & Felde V.A. (organizers), internal report. XXXVI International Bog ('Moor') Excursion of the Institute of Plant Sciences, University of Bern, southern and south-eastern Norway, 8-13 September 2012, Excursion Guide. University of Bergen, Norway and Bjerknes Centre for Climate Research, Bergen, Norway (2012).	EPD
OTTSVA	Svartvatnet	-	Birks, H.H., Birks, H.J.B., Bjune, A.E. & Felde V.A. (organizers), internal report. XXXVI International Bog ('Moor') Excursion of the Institute of Plant Sciences, University of Bern, southern and south-eastern Norway, 8-13 September 2012, Excursion Guide. University of Bergen, Norway and Bjerknes Centre for Climate Research, Bergen, Norway (2012).	EPD
OTTTIA	Tiåvatnet	-	Birks, H.H., Birks, H.J.B., Bjune, A.E. & Felde V.A. (organizers), internal report. XXXVI International Bog ('Moor') Excursion of the Institute of Plant Sciences, University of Bern, southern and south-eastern Norway, 8-13 September 2012, Excursion Guide. University of Bergen, Norway and Bjerknes Centre for Climate Research, Bergen, Norway (2012).	EPD
OVSA	Oberderdingen-Großvillars	-	Rösch, M. Zur Vegetationsgeschichte des südlichen Kraichgaus - Botanische Untersuchungen bei Großvillars, Gemeinde Oberderdingen, Landkreis Karlsruhe. Fundberichte. Aus Baden-Wüttemberg 28(1), 839-370 (2005).	EPD
OYKJA	Vestre Oykjamyrtorn	-	Bjune, A.E. Holocene vegetation history and tree-line changes on a north-south transect crossing major climate gradients in southern Norway: evidence from pollen and plant macrofossils in lake sediment. Review of Paleobotany and Palynology 133, 249-275 (2005).	EPD
PADUGU	Pas du Gu	-	Bernard, J. Paléoenvironnement du Pays de Retz et du marais breton-vendéen. Thèse de Doctorat, Université de Nantes, France (1996).	New model
PAKLICKIE	Paklickie lake	-	Noryśkiewicz, A.M. Palinologiczny obraz wczsnośredniowiecznego osadnictwa pogranicza wielkopolsko-lubuskiego (jeziora Paklicko Wielke, Długie i Lubiąż). In: Chudziak, W., Kaźmierczak, R. (eds.) Człowiek na pograniczu. Na peryferiach Civitas Schinesghe. Instytut Archeologii UMK w Toruniu, Toruń, 93-105 (2020).	Original publication
PARIGNE2	Tourbière de Landemarais	-	Visset, L. La tourbière de Landemarais en Parigné (Ille-et-Vilaine, France). 2. Etude pollinique, Lejeunia 129, 16-26 (1989).	New model
Parpary	Parpary	-	Brown, A.D. Vegetation change in Prussia: the palynological data. In: Pluskowksi, A.G. (ed.) Environment, Colonization, and the Crusader States in Medieval Livonia and Prussia. Brepols, Turnhout, 293-332 (2019).	Original publication
PAVIN1	Lake Pavin	Cyperaceae	Stebich, M., Brüchmann, C., Kulbe, T. & Negendank, J.F.W. Vegetation history, human impact and climate change during the last 700 years recorded in annually laminated sediments of Lac Pavin, France. Review of Palaeobotany and Palynology 133(1-2), 115-133 (2005).	Original publication
PAVIN2	Lake Pavin	Cyperaceae	Chassiot, L. et al. A 7000-year environmental history and soil erosion record inferred from the deep sediments of Lake Pavin (Massif Central, France). Palaeogeography, Palaeoclimatology, Palaeoecology 497, 218-233 (2018).	New model
PAWLUG	Pawski Ług	Cyperaceae, Calluna vulgaris	Lamentowicz, M. et al. From tribe to the feudal state: Knights Hospitaller economy triggers a rapid critical land-use transition from pristine forest to farming (in preparation).	Original publication
PENANEGR	Peña Negra	Cyperaceae	Abel-Schaad, D. & López-Sáez, J.A. Vegetation changes in relation to fire history and human activities at the Peña Negra mire (Bejar Range, Iberian Central Mountain Sysrem, Spain) during the past 4,000 years. Vegetation History and Archaeobotany 22(3), 199-214 (2013).	Original publication
PET	Petrešiūnai	-	Stančikaitė, M. et al. Reconstruction of the mid-to Late- Holocene history of vegetation and land-use in Petrešiūnai, north-east Lithuania: implications from palaeobotanical and archaeological data. Quaternary International 516, 5-20 (2019).	Original publication
PEZOU	Pezou	Cyperaceae	Piana, J., Carcaud, N., Cyprien, A.L., Visset, L. & Leroy D. Dynamique paysagère tardiglaciaire et holocène dans la vallée du Loir à Pezou (Loir-et-Cher) : développements méthodologiques et premiers résultats. Norois 213(4), 73-88 (2009).	EPD
PICO	Puerto del Pico	Cyperaceae	López-Sáez, J.A. et al. Exploring seven hundred years of transhumance, climate dynamic, fire and human activity through a historical mountain pass in central Spain. Journal of Mountain Science 13(7), 1139-1153 (2016).	New model
PINBLANC	Fuente del Pino Blanco	Alnus, Cyperaceae	Robles-Lopez, S. et al. The dialectic between deciduous and coniferous forests in central Iberia: Apalaeoenvironmental perspective during the late Holocene in the Gredos range. Quaternary International 470(A), 148-165 (2018).	Original publication
POUPINIE	Marais de la Poupinière	-	Ouguerram, A. Histoire de la vallée de l'Erdre (affluent de la Loire, Massif armoricain, France) de la fin du tardiglaciaire aux époques actuelles. Thèse de biologie, spécialité palynologie, Université Moulay Ismaïl (Maroc) et Université de Nantes, France (2002).	EPD
PRADELL	Pradell	Cichorioideae, Cyperaceae	Ejarque, A. et al. Tracing the history of highland human management in the eastern Pre-Pyrenees: an interdisciplinary palaeoenvironmental study at the Pradell fen, Spain. The Holocene 19(8), 1241-1255 (2009).	Original publication
PRAVER	Lac de Praver	-	Nakagawa, T. Etudes palynologiques dans les Alpes Françaises centrales et méridionales: histoire de la végétation Tardiglaciaire et Holocène [Pollen studies in the central meridional French Alps: Lateglacial and Holocene vegetation history] PhD. Dissertation of Biology and Ecology, University of Marseille III (1998).	Original publication
PUREKN	Puscizna Rekowianska	Cyperaceae, Ericaceae, Trifolium type	Obidowicz, A. Eine pollenanalytische und moorkundliche Studie zur Vegetationsgeschichte des Podhale-Gebietes (West-Karpaten). Acta Palaeobotanica 30(1), 147-219 (1990).	New model
Radzyn	Radzyn	-	Brown, A.D. Vegetation change in Prussia: the palynological data. In: Pluskowksi, A.G. (ed.) Environment, Colonization, and the Crusader States in Medieval Livonia and Prussia. Brepols, Turnhout, 293-332 (2019).	Original publication
RANDULA	Prados de Randulanda	Cyperaceae	Perez-Diaz, S. & Lopez-Saez, J.A. Contributions to the European Pollen Database. 23. Prados de Randulanda peat bog (Basque Country, Northern Iberian Peninsula, Spain). Grana 53(3), 252-254 (2014).	New model
RÅS	Råshult	-	Lindbladh, M. & Bradshaw, R.H.W. The origin of present forest composition and pattern in southern Sweden. Journal of Biogeography 25, 463-477 (1998).	Original publication
REDONDO	El Redondo	Cyperaceae	López-Sáez, J.A. et al. Landscape dynamics and human impact on high-mountain woodlands inthe western Spanish Central System during the last three millennia. Journal of Archaeological Science: Reports 9, 203-218 (2016).	New model
REGET	Regetovka	Cyperaceae	Wacnik, A. The vegetational history of local flora and evidences of human activities recorded in the pollen diagram from Side Regetovka, NE Slovakia. Acta Palaeobotanica 35(2), 253-274 (1995).	New model
RICKSY	Ricksy Ball	-	Fyfe, R.M., unpublished data.	Unpublished
ROMAN	Roman Lode	-	Fyfe, R.M. Roman Lode, Burcombe, Exmoor, North Devon: pollen analysis of blanket peat deposits. English Heritage Research Department Report Series no. 24 (2009).	Original publication
ROTÄ	Rosts Täppa	-	Lagerås, P. The ecology of expansion and abandonment: medieval and post-medieval land-use and settlement dynamics in a landscape perspective. Riksantikvarieämbetet, Stockholm (2007).	Original publication
ROUSSY	Tourbière de Roussy	-	Miras, Y. et al. Histoire de l'environnement et des dynamiques agro-pastorales dans le massif du Cantal: la tourbière de Roussy (Saint-Projet-de- Salers, France). Quaternaire 14(4), 265-278 (2003).	EPD
RYONANSU	Ryönänsuo	-	Rankama, T. & Vuorela I. Between inland and coast in Metal Age Finland - human impact on the premeval forests of Southern Ha"me during the Iron Age. Memoranda Societatis Pro Fauna et Flora Fennica 64, 25-34 (1988).	New model
Rywald	Rywald	-	Brown, A.D. Vegetation change in Prussia: the palynological data. In: Pluskowksi, A.G. (ed.) Environment, Colonization, and the Crusader States in Medieval Livonia and Prussia. Brepols, Turnhout, 293-332 (2019).	Original publication
S2P	Elefsis	Cyperaceae, Pinus	Kyrikou, S. et al. Late Glacial and Holocene vegetation patterns of Attica: A high-resolution record from Elefsis Bay, southern Greece. Quaternary International 545, 28-37 (2020).	Original publication
S84	Lake Skrzetuszewskie 1	Cyperaceae	Tobolski, K. Dotychczasowy stan badań paleobotanicznych i biostratygraficznych Lednickiego Parku Krajobrazowego. In: Tobolski, K. (ed.), Wstęp do paleoekologii Lednickiego Parku Krajobrazowego. Wydawnictwo Naukowe Uniwersytetu im. Adama Mickiewicza, Poznań (1991).	New model
S87	Lake Skrzetuszewskie 2	Cyperaceae	Tobolski, K. Paläoökologische Untersuchungen des Siedlungsgebietes im Lednica Landschaftspark (Nordwestpolen). Offa 47, 109-131 (1990).	New model
SELIKHOV	Selikhovo	-	Novenko, E.Y. et al. Mid- and late-Holocene vegetation history, climate and human impact in the forest-steppe ecotone of European Russia: new data and a regional synthesis. Biodiversity and Conservation 25, 2453-2472 (2016).	Original publication
SERRANIL	Puerto de Serranillos	Cyperaceae	López-Merino, L., López-Sáez, J.A., Pérez-Díaz, S. & Carrión J.S. 2000 years of pastoralism and fire shaping high-altitude vegetation of Sierra de Gredos in central Spain. Review of Palaeobotany and Palynology 158, 42-51 (2009).	Original publication
SETESGR	Grostj¢rna	-	Eide, W., Birks, H.H., Bigelow, N.H., Peglar, S.M. & Birks H.J.B. Holocene forest development along the Setesdal valley, southern Norway, reconstructed from macrofossil and pollen evidence. Vegetation History and Archaeobotany 15, 65-85 (2006).	EPD
SETESR	Reiarsdalsvatn	-	Birks, H.H., Birks, H.J.B., Bjune, A.E. & Felde V.A. (organizers), internal report. XXXVI International Bog ('Moor') Excursion of the Institute of Plant Sciences, University of Bern, southern and south-eastern Norway, 8-13 September 2012, Excursion Guide. University of Bergen, Norway and Bjerknes Centre for Climate Research, Bergen, Norway (2012).	EPD
SIG	Siggaboda	-	Björkman, L. & Bradshaw, R.H.W. The immigration of Fagus sylvatica L. and Picea abies (L.) Karst. into a natural forest stand in southern Sweden during the last 2000 years. Journal of Biogeography 23, 235-244 (1996).	Original publication
SILBERHO	Silberhohl	-	Chen, S.H. Neue Untersuchungen über die spät- und postglaziale Vegetationsgeschichte im Gebiet zwischen Harz und Leine (BRD). Flora 181, 147-177 (1988).	New model
SKÄ	Skärpingegöl	-	Fredh, E.D. et al. Farm establishment, abandonment and agricultural practices during the last 1,300 years: a case study from southern Sweden based on pollen records and the LOVE model. Veget Hist Archaeobot 28, 529-544 (2019).	Original publication
SONENBGM	Sonnenberger Moor	-	Willutzki, H. Zur Waldgeschichte und Vermoorung sowie über Rekurrenzflächen im Oberharz. Nova Acta Leopoldina, Neue Folge (1962).	EPD
SOTOM	Sotombo	Cyperaceae	Pérez Díaz, S. et al. Seis mil años de gestión y dinámica antrópica en el entorno del Parque Natural de los Collados del Asón (Cordillera Cantábrica Oriental). Cuaternario y Geomorfología 30(3-4), 49-74 (2016).	New model
StBolC	Stará Boleslav (čistička)	Cyperaceae	Břízová, E. Late Glacial and Holocene development of the vegetation in the Labe (Elbe) river flood-plain (Central Bohemia, Czech Republic). Acta Palaeobotanica 2, 549-554 (1999).	PALYCZ (Chron #2)
StBolH	Stará Boleslav - hradiště	-	Kozáková, R. et al. Early to high medieval colonization and alluvial landscape transformation of the Labe valley (Czech Republic): evaluation of archaeological, pollen and macrofossil evidence. Vegetation History and Archaeobotany 23, 701-718 (2014).	PALYCZ (Chron #2)
STEERMOS	Steerenmoos	-	Rösch, M. Long-term human impact as registered in an upland pollen profile from the southern Black Forest, southwestern Germany. Veget Hist Archaeobot 9, 205-218 (2000).	EPD
STEERTMO	Steertmoor Fickmühlen	-	Behre, K.E. & Kucan D. Die Geschichte der Kulturlandschaft und des Ackerbaus in der Siedlungskammer Flögeln, Niedersachsen, seit der Jungsteinzeit. Probleme der Küstenforschung im südlichen Nordseegebiet 21, Isensee, Oldenburg (1994).	EPD
STEINKIS	Steinkiste	-	Behre, K.E. & Kucan D. Die Geschichte der Kulturlandschaft und des Ackerbaus in der Siedlungskammer Flögeln, Niedersachsen, seit der Jungsteinzeit. Probleme der Küstenforschung im südlichen Nordseegebiet 21, Isensee, Oldenburg (1994).	EPD
STMO	Store Mosse	-	Björkman, L. Pollenanalytisk undersökning av tre torvmarkslokaler från Öggestorps och Rogberga socknar inför ombyggnaden av Riksväg 31, delen Öggestorp–Åkarp, Jönköpings kommun. Lundqua Uppdrag 45. Department of Quaternary Geology, Lund University (2003).	Original publication
STO	Storasjö	-	Eriksson, G. Skogshistoria, kulturpåverkan och urskogsvärden I fem skogsreservat I Kronobergs län. Master’s Thesis, University of Umeå (1996).	Original publication
STONETOR	Stonetor Brook	-	Fyfe, R.M. et al. Historical context and chronology of Bronze Age enclosure on Dartmoor, UK. Journal of Archaeological Science 35(8), 2250-2261 (2008).	Original publication
SUM	Suminko Lake	-	Pędziszewska, A. et al. Holocene environmental changesreﬂected by pollen, diatoms, and geochemistry of annuallylaminated sediments of Lake Suminko in the Kashubian LakeDistrict (N Poland). Rev Palaeobot Palynol 216, 55-75 (2015).	Original publication
SUR	Szurpiły	-	Kinder, M. et al. Holocene history of human impacts inferred from annually laminated sediments in Lake Szurpiły, northeast Poland. Journal of Paleolimnology 61, 419-435 (2019).	Kinder, M. et al. Construction and validation of cal-endar-year time scale for annually laminated sediments—an example from Lake Szurpiły (NE Poland). GFF 135, 248-25 (2013).
SWIETE	Święte	Cyperaceae, Ericaceae	Czerwińskia, S. et al. Environmental implications of past socioeconomic events in Greater Poland during the last 1200 years. Synthesis of paleoecological and historical data. Quaternay Science Reviewers (2021).	Original publication
TARN1_N	Tarnawa Wyżna	Cyperaceae	Ralska-Jasiewiczowa, M. Late-Glacial and Holocene Vegetation of the Bieszczady Mts. (Polish Eastern Carpathians). Państwowe Wydawnictwo Naukowe, Warszawa–Kraków (1980).	New model
TG8	Delta del Rio Besos	-	Pantaléon-Cano, J., Pérez-Obiol, R.P. & Roure J.M. La representacion del paisaje vegetal del area de Barcelona durante en ultimo milenio a partir del analisis polinico de sedimentos marinos del delta del rio Besos datados por 210Pb. In: Mateu, I., Dupre, M., Guemes, J. & Burgaz, M.E. (eds.) Trabajos de palinologia basica y aplicada. Universitat de València, 211-223 (1994).	EPD
THEVALLE	Moulin de Thévalles	-	Visset, L., Barbier, D. & Ouguerram A. Le paysage végétal dans le Bas-Maine (Mayenne, France), le long de la vallée de l'Erve, de la fin du Mésolithique à l'époque récente. Revue Archéologique de l'Ouest 22, 85-92 (2005).	EPD
TIEMBLO	El Tiemblo	Cyperaceae	Lopez-Saez, J.A. et al. Unraveling the naturalness of sweet chestnut forests (Castanea sativa Mill.) in central Spain. Vegetation History and Archaeobotany 26, 167-182 (2017).	New model
TIT	Titisee	Cyperaceae	Knopf, T. et al. Archäologische und naturwissenschaftliche Untersuchungen zur Landnutzungsgeschichte des Südschwarzwalds. Fundberichte aus Baden-Württemberg 39, 19-101 (2019).	Original publication
TORSE	La boire Torse	-	Joly, C. & Visset L. Etude paléoenvironnementale de la Grande Prée de Varades (La boire Torse) dans le bassin aval de la Loire (Loire-Atlantique, France). Revue Archéologique du Loiret 35, 9-16 (2011).	EPD
TRA	Trälhultet	-	Björkman, L. Pollenanalytisk undersökning av en torvmarkslagerföljd från Trälhultet i Biskopstorps naturreservat, Halmstads kommun. Lundqua Uppdrag 29. Department of Quaternary Geology, Lund University (2000).	Original publication
TREPPEL	Grosser Treppelsee	-	Giesecke, T. Pollenanalytische und sedimentchemische Untersuchungen zur natürlichen und anthropogenen Geschichte im Schlaubetal. Sitzungsberichte der Gesellschaft Naturforschender Freunde zu Berlin 39, 89-112 (2000).	EPD
Trikatas	Trikatas	Cyperaceae	Stivrins, N. et al. Palaeoenvironmental evidence for the impact of the crusades on the local and regional environment of medieval (13th-16th century) northern Latvia, eastern Baltic. The Holocene 26, 61-69 (2016).	Stivrins, N. et al. Detection of the Askja AD 1875 cryptotephra in Latvia, Eastern Europe. Journal of Quaternary Science 31, 437-441 (2016).
TRIST	Tristinika	-	Panajiotidis, S. & Papadopoulou, M.L. Human-landscape interactions in Halkidiki (NC Greece) over the last 3.5 millennia, revealed through palynological, and archaeological-historical archives. Journal of Archaeological Science: Reports 7, 138-145 (2016).	Original publication
TULLERIN	Tullerinsuo	-	Vuorela, I. Lounais-suomen varhaismetallikautinen asutus ja viljely siitepölyanalyysin valossa. Karhunhammas 13, 2-23 (1991).	New model
URAGHWOO	Uragh Wood	-	Little, D.J., Mitchell, F.J.G., von Engelbrechten, S. & Farrell, E.P. Assessment of the impact of the past disturbance and prehistoric Pinus sylvestris on vegetation dynamics and soil development in Uragh Wood, SW Ireland. The Holocene 6(1), 90-99 (1996).	Original publication
VALDECON	Arroyo deValdeconejos	Cyperaceae	Morales-Molino, C. et al. Land-use history as a major driver for long-term forest dynamics in the Sierra de Guadarrama National Park (central Spain) during the last millennia: implications for forest conservation and management. Global and Planetary Change 152, 64-75 (2017).	Original publication
VAQUERO	Fuente del Vaquero	Cyperaceae	Perez-Diaz, S. & Lopez-Saez, J.A. Contributions to the European Pollen Database. 27. Fuente del Vaquero peat bog (Basque Country, Northern Iberian Peninsula, Spain). Grana 54(1), 82-84 (2015).	New model
VERDEMOY	La Verderie	-	Barbier, D. Histoire de la végétation du nord-mayennais de la fin du Weichsélien à l'aube du XXIeme siècle. Mise en évidence d'un Tardiglaciaire armoricain. Interactions Homme-Milieu. Thèse de doctorat de l'Université de Nantes. Biologie. Spécialité : Palynologie (1999).	EPD
VERPESOA	Verdeospesoa mire	Cyperaceae	Perez-Diaz, S. & Lopez-Saez, J.A. Contributions to the European Pollen Database. 33. Verdeospesoa mire (Basque Country, Northern Iberian Peninsula, Spain). Grana 56(4), 315-317 (2017).	New model
Ves	Veselov	Cyperaceae	Kozáková, R. et al. Prehistoric human impact in the mountains of Bohemia. Do pollen and archaeological data support the traditional scenario of a prehistoric "wilderness"? Review of Palaeobotany and Palynology 220, 29-43 (2015).	PALYCZ (Chron #1)
VICO	Lago di Vico	-	Sadori, L. & Masi, A., unpublished data.	Unpublished
VILLETE2	Etang de la Villetelle	Alnus	Miras, Y. L'analyse pollinique du plateau de Millevaches (Massif central, France) et de sites périfériques limousins et auvergnats: Approche des paléoenvironnements, des systèmes agro-pastoraux et évolution des territoires ruraux. [The pollen analysis of the plateau de Millevaches (Massif central, France) and of surrounding sites in Limousin and Auvergne]. Thesis of Biology. Université de Franche…	EPD
VINOR	Vinoř	-	Pokorný, P., unpublished data.	PALYCZ (Chron #1)
Voras	Voras	Cyperaceae	Gerasimidis, A., Athanasiadis, N. & Panajiotidis, S. Contributions to the European Pollen Database. 8. Mount Voras (north-west Greece). Grana 48, 316-318 (2009).	Original publication
VRA3	Vraona	Cyperaceae	Kouli, K. Vegetation development and human activities in Attiki (SE Greece) during the last 5,000 years. Veg Hist Archaeobot 21, 267-278 (2012).	Triantaphyllou, M.V. et al. Paleoenvironmental changes since 3000 BC in the coastal marsh of Vravron (Attica, SE Greece). Quat. Int. 216, 14-22 (2010).
WA3ROH	Wachel 3	-	Dörfler, W. Pollenanalytische Untersuchungen zur Vegetationsund Siedlungsgeschichte im Süden des Landkreises Cuxhaven, Niedersachsen. Probleme der Küstenforschung im südlichen Nordseegebiet 17, 1-75 (1989).	New model
WILA	Wilder See beim Ruhestein	-	Rösch, M. Botanical evidence for prehistoric and medieval land use in Black Forest. Medieval Rural Settlement in Marginal Landscapes. Ruralia VII, 8th-14th September 2007 Cardiff Wales, U.K., 335-343 (2007).	EPD
WINDMILL	Windmill Rough	-	Fyfe, R.M., Brown, A.G. & Rippon S.J. Characterising the late prehistoric, "Romano-British" and medieval landscape, and dating the emergence of a regionally distinct agricultural system in South West Britain. Journal of Archaeological Science 31(12), 1699-1714 (2004).	Original publication
WINNEYS	Winneys Down	-	Fyfe, R.M. & Woodbridge, J. Differences in time and space in upland vegetation patterning: analysis of pollen data from Dartmoor, UK. Lanscape Ecology 27(5), 745-760 (2012).	Original publication
WOJN	Lake Wojnowo	-	Wacnik, A., Goslar, T. & Czernik, J. Vegetation changes caused by agricultural societies in the Great Mazurian Lake District. Acta Palaeobotanica 52(1), 59-104 (2012).	Original publication
WolinII	Wolin II	Cyperaceae	Latalowa, M. Man and vegetation in the pollen diagrams from Wolin Island. Acta Palaeobotanica 32, 123-249 (1992).	New model
YLIMYSNE	Ylimysneva	-	Huttunen, A. Vegetation and palaeoecology of a bog complex in southern Finland. Aquilo ser. Bot. 28, 27-37 (1990).	New model
YTBE	Yttra Berg	Cyperaceae, Cannabis	Sköld, E., Lagerås, P. & Berglund, B.E. Temporal cultural landscape dynamics in a marginal upland area: agricultural expansions and contractions inferred from palynological evidence at Yttra Berg, southern Sweden. Vegetation History and Archaeobotany 19, 121-136 (2010).	Original publication
ZAB	Lake Żabińskie	-	Wacnik, A. et al. Determining the Responses of Vegetation to Natural Processes and Human Impacts in North-Eastern Poland during the Last Millennium: Combined Pollen, Geochemical and Historical Data. Vegetation History and Archaeobotany 25(5), 479-498 (2016).	Bonk, A., Tylmann, W., Goslar, T., Wacnik, A. & Grosjean, M. Comparing varve counting and 14C-AMS chronologies in the sediments of Lake Żabińskie, Northeastern Poland: implications for accurate 14C dating of lake sediments. Geochronometria 42, 159-171 (2015).
Zah	Zahájí	Cyperaceae	Pokorný, P. Role of man in the development of Holocene vegetation in Central Bohemia. Preslia 77(1), 113-128 (2005).	PALYCZ (Chron #3)
ZALAMA	Zalama	Cyperaceae	Perez-Diaz, S., Lopez-Saez, J.A., Pontevedra-Pombal, X., Souto-Souto, M., Galop, D. 8000 years of vegetation history in the northern Iberian Peninsula inferred from the palaeoenvironmental study of the Zalama ombrotrophic bog (Basque-Cantabrian Mountains, Spain). Boreas 45, 658-672 (2016).	New model
ZEL	Zeller See	Cyperaceae	Rösch, M. & Marinova, E. Contributions to the European Pollen Database 51. Zeller See. Grana (2020).	Original publication
Zielone Bagno	Zielone Bagno	-	Brown, A.D. Vegetation change in Prussia: the palynological data. In: Pluskowksi, A.G. (ed.) Environment, Colonization, and the Crusader States in Medieval Livonia and Prussia. Brepols, Turnhout, 293-332 (2019).	Original publication
